# Supplementary material for: Mutations in Parkinsonism-linked endocytic proteins synaptojanin1 and auxilin have synergistic effects on dopaminergic axonal pathology
Source: PubMed Central journal article supplement (PMC9932162; doi:10.1038/s41531-023-00465-5), 2023-02-15

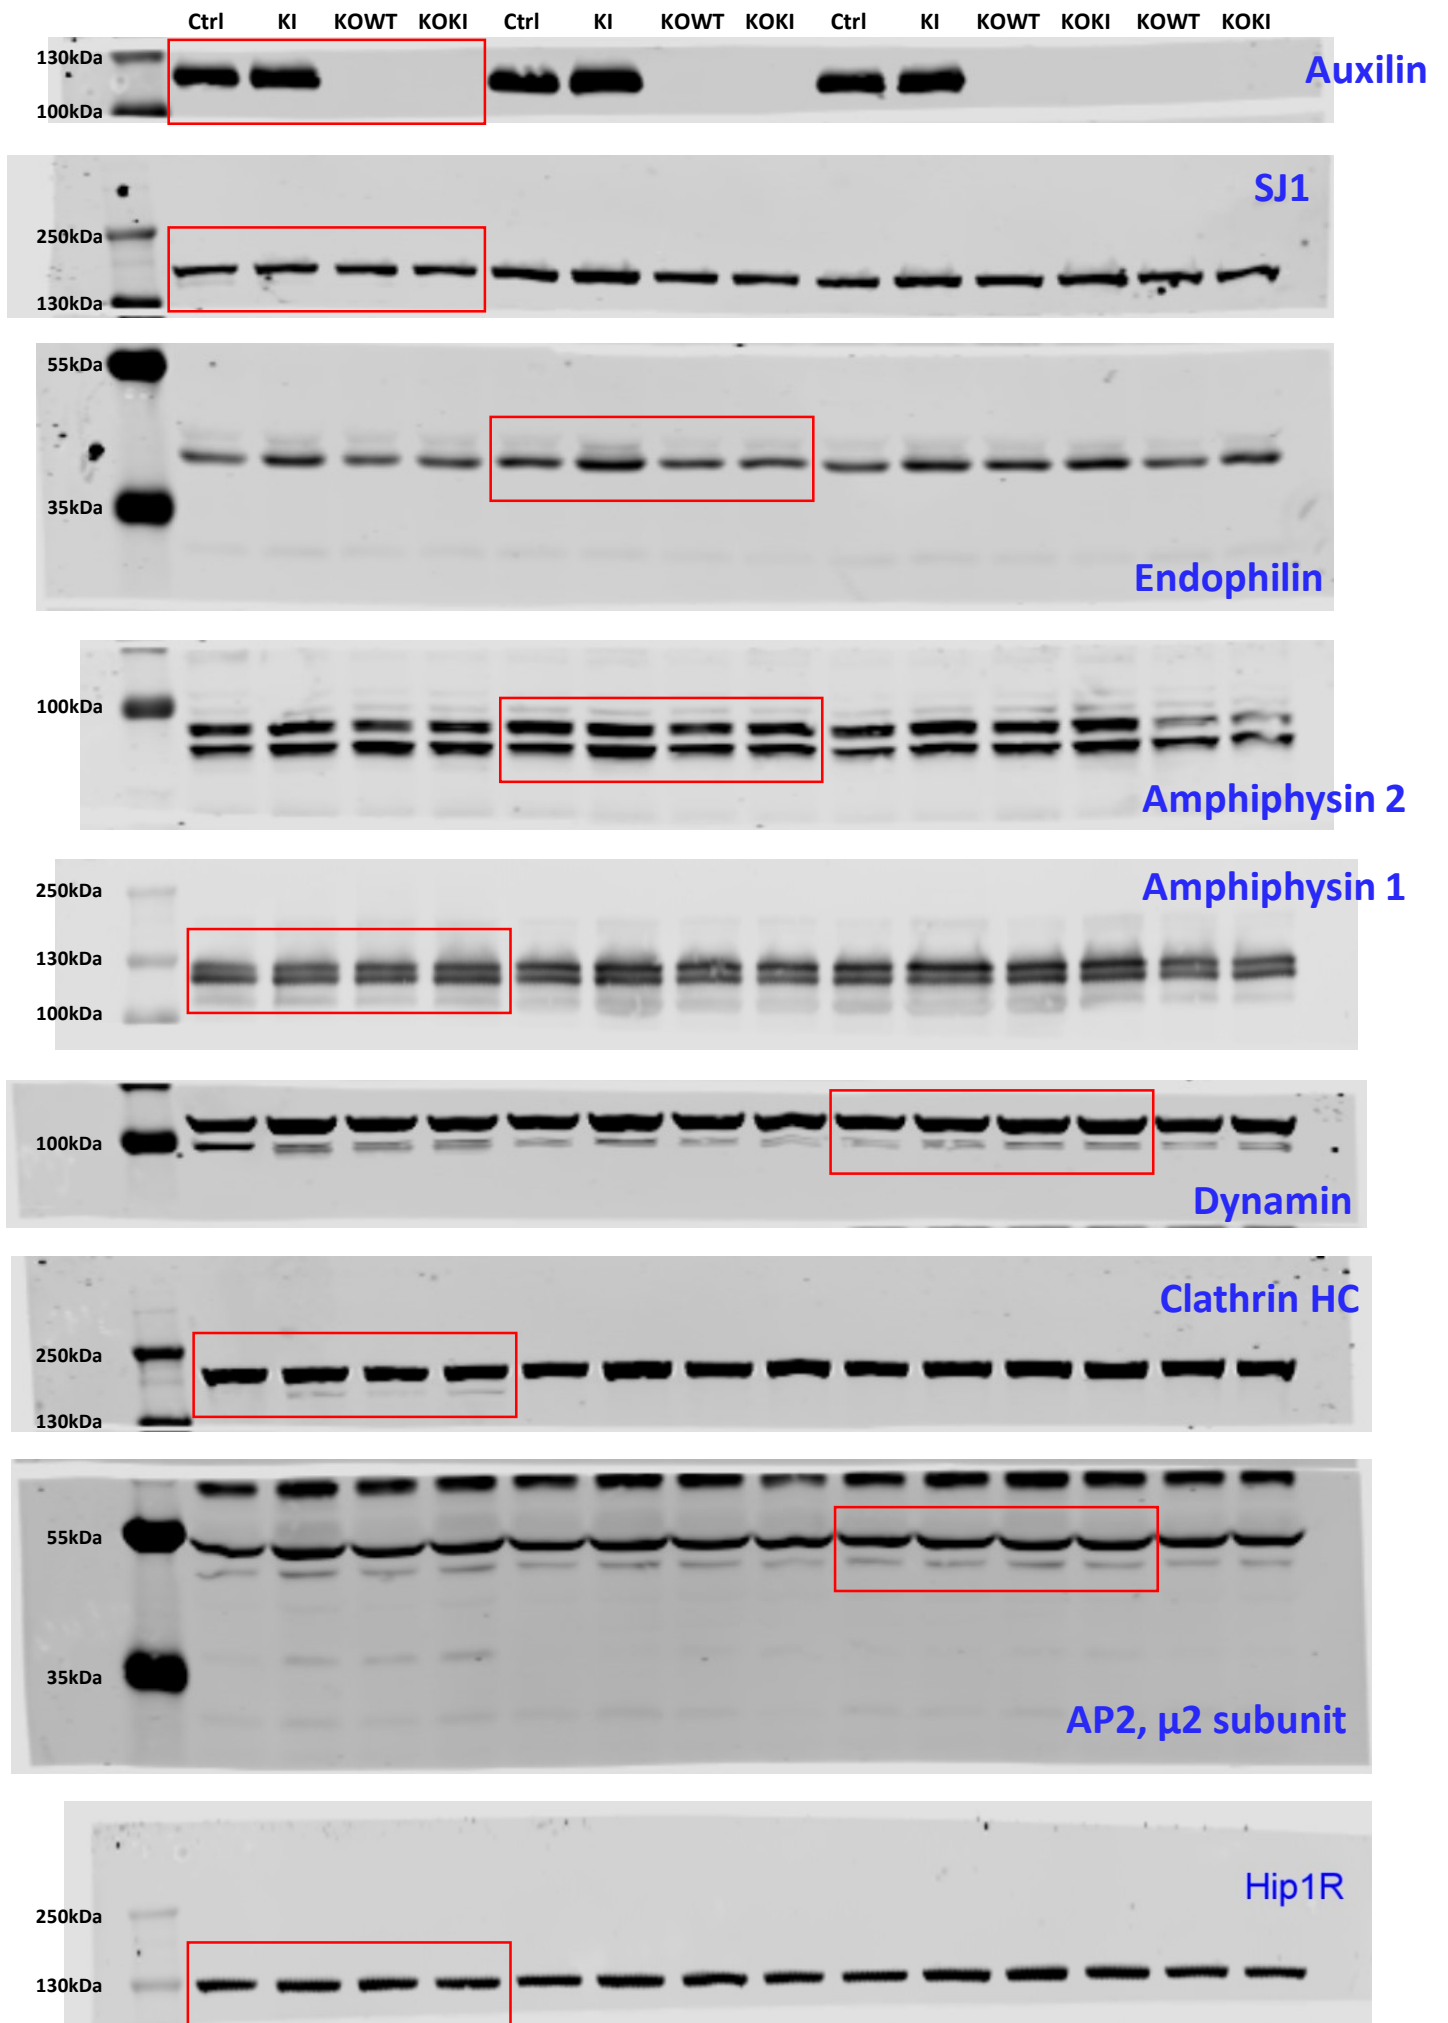

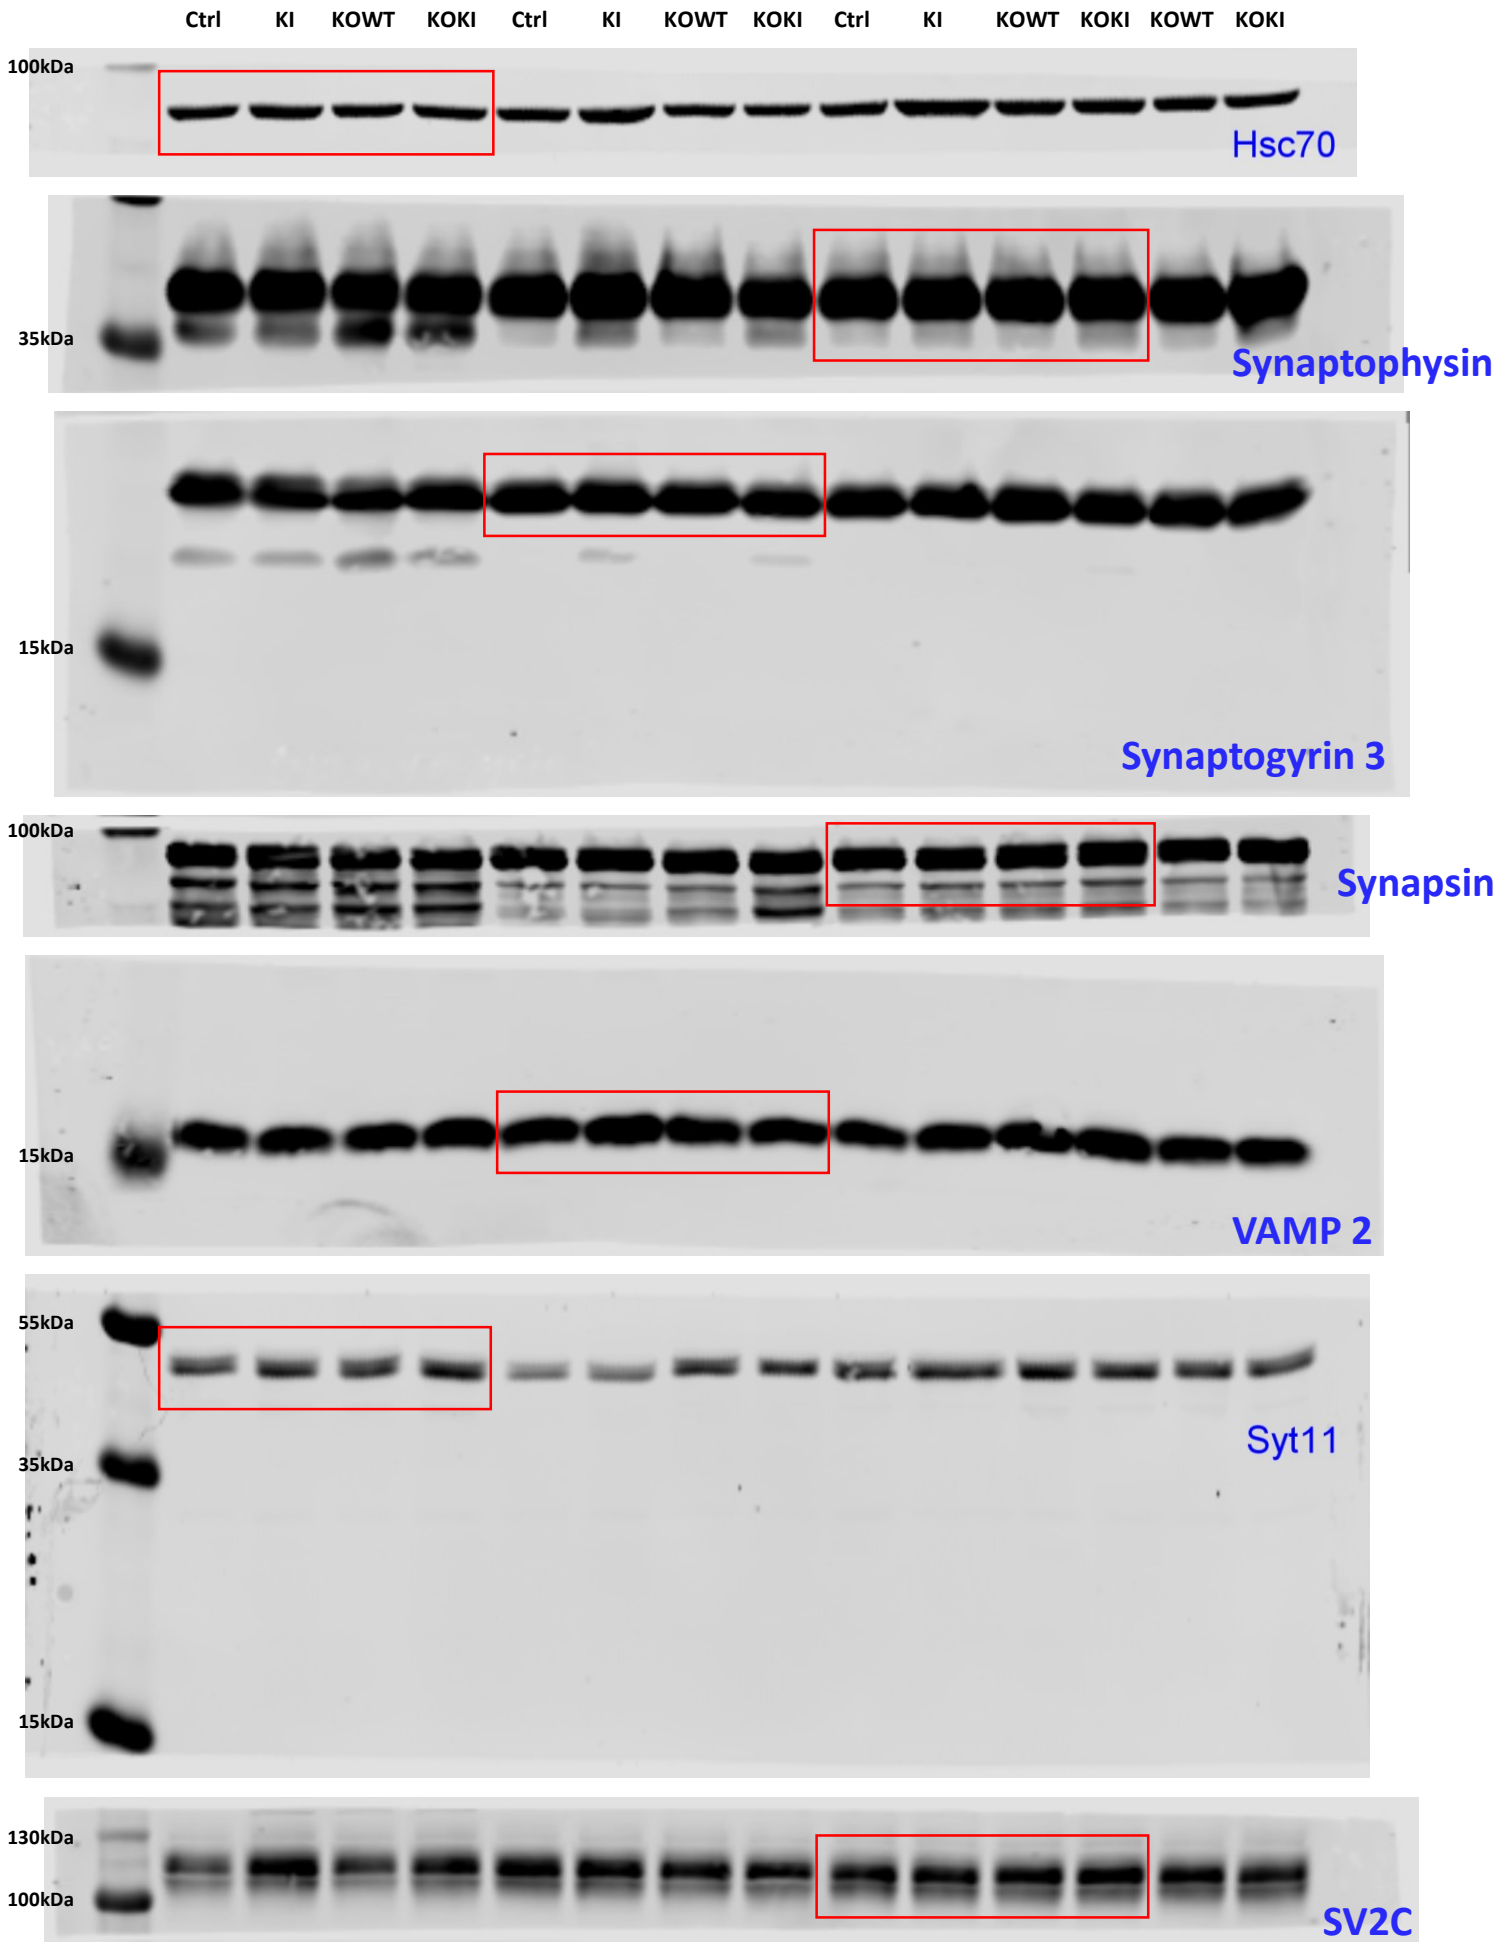

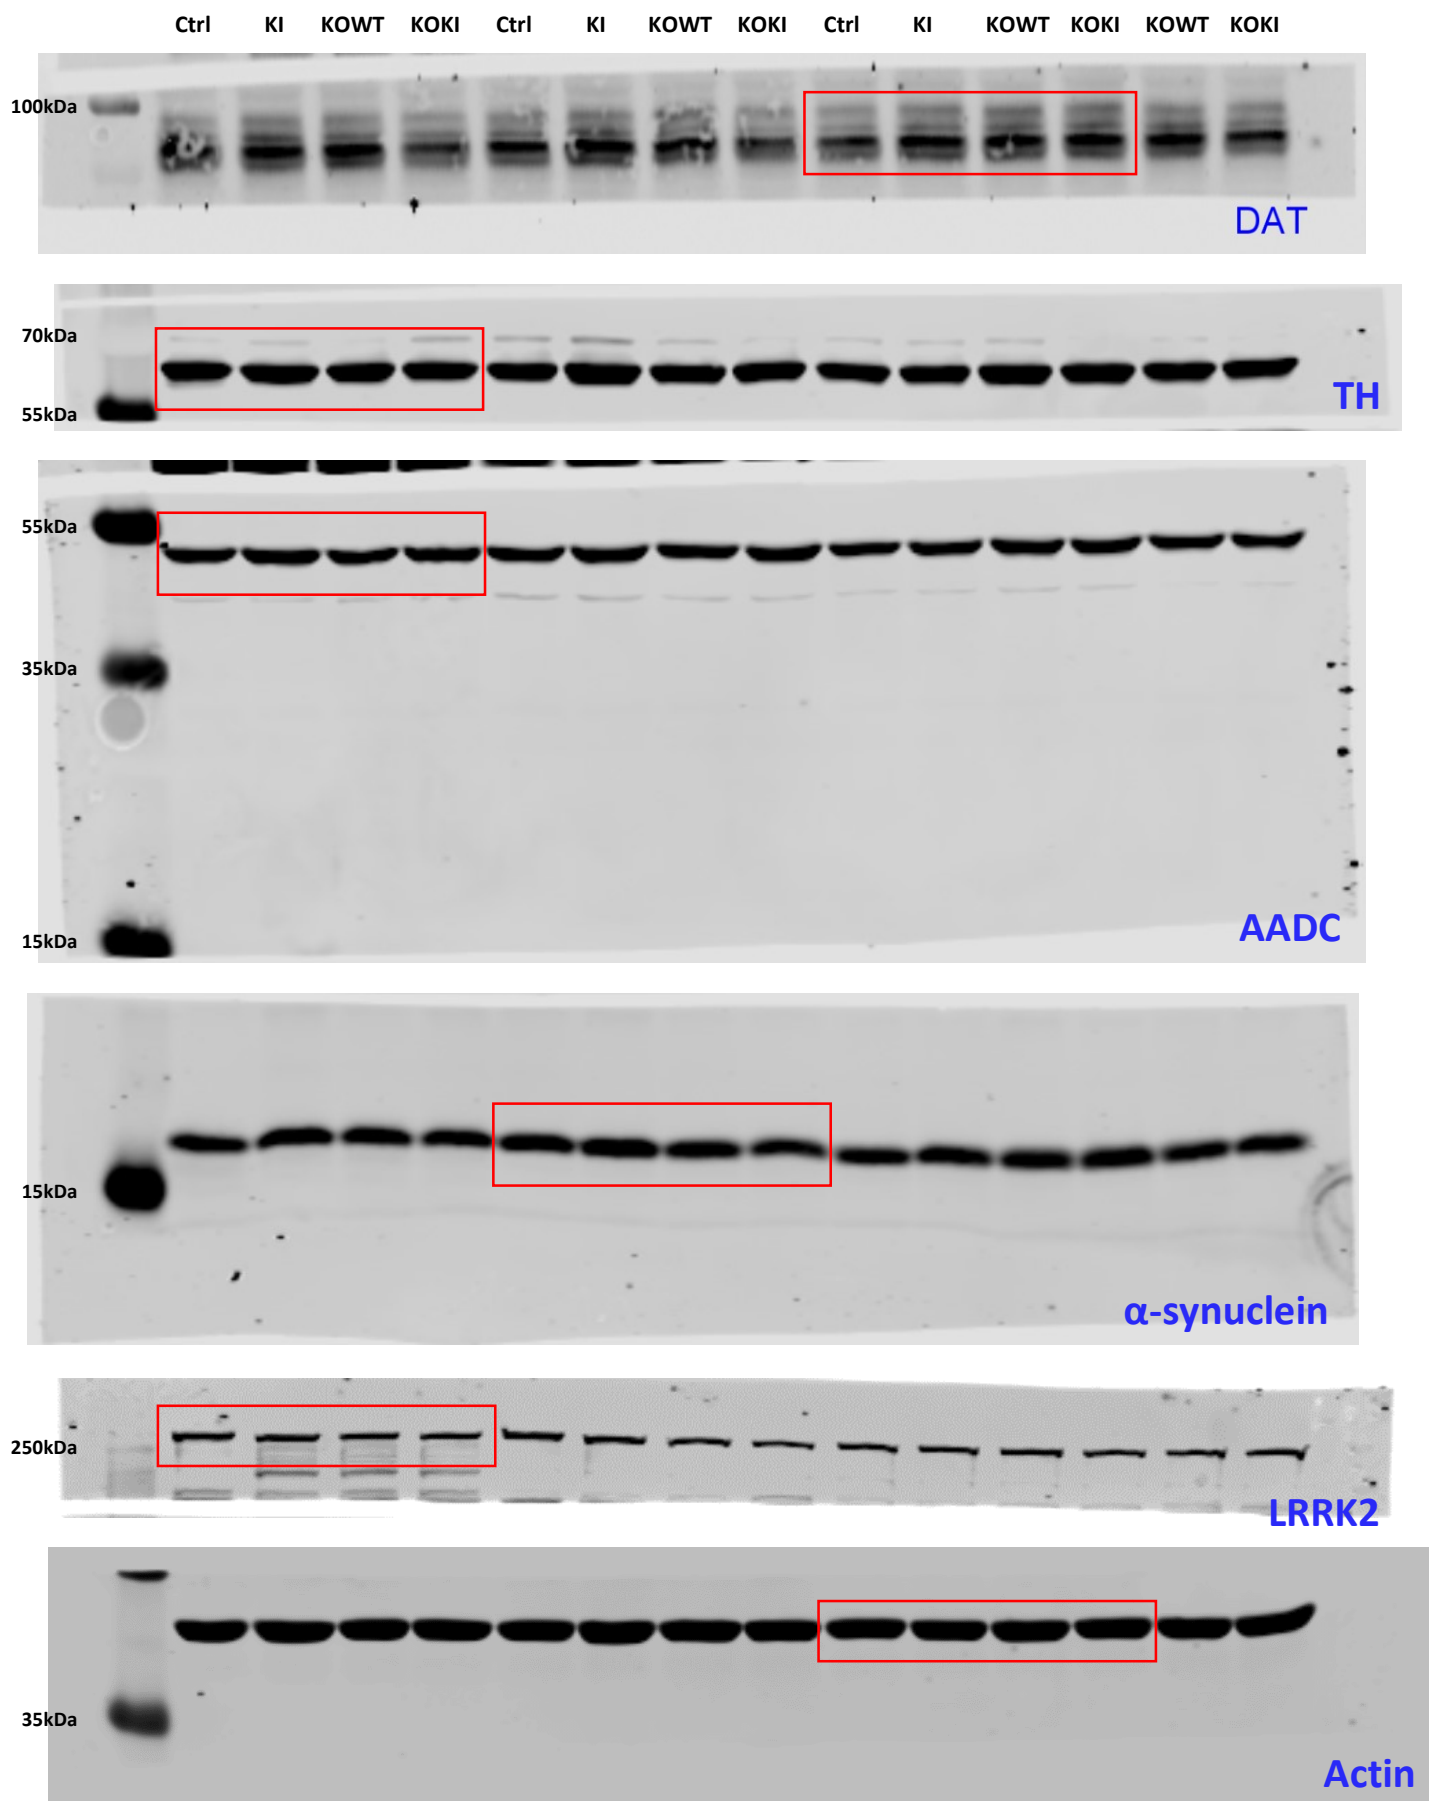

Supplement: 41531_2023_465_MOESM2_ESM.pdf [file 41531_2023_465_MOESM2_ESM.pdf]
