# Supplementary material for: Mutations in Parkinsonism-linked endocytic proteins synaptojanin1 and auxilin have synergistic effects on dopaminergic axonal pathology
Source: PubMed Central journal article supplement (PMC9932162; doi:10.1038/s41531-023-00465-5), 2023-02-15
Supplement: 41531_2023_465_MOESM3_ESM.pdf [file 41531_2023_465_MOESM3_ESM.pdf]

## Reporting Summary

Nature Portfolio wishes to improve the reproducibility of the work that we publish. This form provides structure for consistency and transparency in reporting. For further information on Nature Portfolio policies, see our [Editorial Policies](#) and the [Editorial Policy Checklist](#).

### Statistics

For all statistical analyses, confirm that the following items are present in the figure legend, table legend, main text, or Methods section.

- | n/a                                 | Confirmed                                                                                                                                                                                                                                                                                      |
|-------------------------------------|------------------------------------------------------------------------------------------------------------------------------------------------------------------------------------------------------------------------------------------------------------------------------------------------|
| <input type="checkbox"/>            | <input checked="" type="checkbox"/> The exact sample size ( $n$ ) for each experimental group/condition, given as a discrete number and unit of measurement                                                                                                                                    |
| <input type="checkbox"/>            | <input checked="" type="checkbox"/> A statement on whether measurements were taken from distinct samples or whether the same sample was measured repeatedly                                                                                                                                    |
| <input type="checkbox"/>            | <input checked="" type="checkbox"/> The statistical test(s) used AND whether they are one- or two-sided<br><i>Only common tests should be described solely by name; describe more complex techniques in the Methods section.</i>                                                               |
| <input checked="" type="checkbox"/> | <input type="checkbox"/> A description of all covariates tested                                                                                                                                                                                                                                |
| <input checked="" type="checkbox"/> | <input type="checkbox"/> A description of any assumptions or corrections, such as tests of normality and adjustment for multiple comparisons                                                                                                                                                   |
| <input type="checkbox"/>            | <input checked="" type="checkbox"/> A full description of the statistical parameters including central tendency (e.g. means) or other basic estimates (e.g. regression coefficient) AND variation (e.g. standard deviation) or associated estimates of uncertainty (e.g. confidence intervals) |
| <input checked="" type="checkbox"/> | <input type="checkbox"/> For null hypothesis testing, the test statistic (e.g. $F$ , $t$ , $r$ ) with confidence intervals, effect sizes, degrees of freedom and $P$ value noted<br><i>Give <math>P</math> values as exact values whenever suitable.</i>                                       |
| <input checked="" type="checkbox"/> | <input type="checkbox"/> For Bayesian analysis, information on the choice of priors and Markov chain Monte Carlo settings                                                                                                                                                                      |
| <input checked="" type="checkbox"/> | <input type="checkbox"/> For hierarchical and complex designs, identification of the appropriate level for tests and full reporting of outcomes                                                                                                                                                |
| <input checked="" type="checkbox"/> | <input type="checkbox"/> Estimates of effect sizes (e.g. Cohen's $d$ , Pearson's $r$ ), indicating how they were calculated                                                                                                                                                                    |

*Our web collection on [statistics for biologists](#) contains articles on many of the points above.*

### Software and code

Policy information about [availability of computer code](#)

- |                 |                                                                                                                                                                                                                                                                                                           |
|-----------------|-----------------------------------------------------------------------------------------------------------------------------------------------------------------------------------------------------------------------------------------------------------------------------------------------------------|
| Data collection | LI-COR Image Studio software (RRID: SCR_015795), Stereo Investigator software (RRID: SCR_002526), MetaMorph Microscopy Automation and Image Analysis Software (RRID: SCR_002368), ChromeleonTM 7.2 Chromatography Data System (RRID: SCR_016874), Thermo Scientific Velox software, iTEM Olympus software |
| Data analysis   | Image Studio Lite software (Ver 5.2, RRID: SCR_013715), Fiji software (Version ImageJ 1.52p/Java 1.8.0_172 (64-bit), RRID: SCR_002285), and GraphPad Prism (Ver 9.3.1, RRID: SCR_002798)                                                                                                                  |

For manuscripts utilizing custom algorithms or software that are central to the research but not yet described in published literature, software must be made available to editors and reviewers. We strongly encourage code deposition in a community repository (e.g. Git-Hub). See the Nature Portfolio [guidelines for submitting code & software](#) for further information.

### Data

Policy information about [availability of data](#)

All manuscripts must include a [data availability statement](#). This statement should provide the following information, where applicable:

- Accession codes, unique identifiers, or web links for publicly available datasets
- A description of any restrictions on data availability
- For clinical datasets or third party data, please ensure that the statement adheres to our [policy](#)

The datasets generated and/or analyzed in this study are available from the corresponding author Mian Cao on request.

## Human research participants

Policy information about [studies involving human research participants and Sex and Gender in Research](#).

|                             |     |
|-----------------------------|-----|
| Reporting on sex and gender | N/A |
| Population characteristics  | N/A |
| Recruitment                 | N/A |
| Ethics oversight            | N/A |

Note that full information on the approval of the study protocol must also be provided in the manuscript.

## Field-specific reporting

Please select the one below that is the best fit for your research. If you are not sure, read the appropriate sections before making your selection.

Life sciences       Behavioural & social sciences       Ecological, evolutionary & environmental sciences

For a reference copy of the document with all sections, see [nature.com/documents/nr-reporting-summary-flat.pdf](https://nature.com/documents/nr-reporting-summary-flat.pdf)

## Life sciences study design

All studies must disclose on these points even when the disclosure is negative.

|                 |                                                                                                                                                                                                                                                                                                         |
|-----------------|---------------------------------------------------------------------------------------------------------------------------------------------------------------------------------------------------------------------------------------------------------------------------------------------------------|
| Sample size     | Sample sizes were stated in the legend of the respective figures and supplementary figures. We did not use any statistical methods to predetermine sample sizes. We repeated all experiments with at least 3 individual mice (biological replicates) to meet the requirements for statistical analysis. |
| Data exclusions | In the stereological analysis of TH-positive DAergic neurons, 1 sample from the Aux-KO/SJ1-KI group was excluded. This is because its coefficient of error (Gundersen, $m=1$ ) exceeded the threshold of 0.1                                                                                            |
| Replication     | All experiments were replicated for at least three times. All attempts at replications were successful.                                                                                                                                                                                                 |
| Randomization   | Mice were placed into their respective group based on their genotypes.                                                                                                                                                                                                                                  |
| Blinding        | Blinding was not possible as mice were genotyped before collection to ensure the right mice were collected for experiments.                                                                                                                                                                             |

## Reporting for specific materials, systems and methods

We require information from authors about some types of materials, experimental systems and methods used in many studies. Here, indicate whether each material, system or method listed is relevant to your study. If you are not sure if a list item applies to your research, read the appropriate section before selecting a response.

### Materials & experimental systems

| n/a                                 | Involvement in the study                                        |
|-------------------------------------|-----------------------------------------------------------------|
| <input type="checkbox"/>            | <input checked="" type="checkbox"/> Antibodies                  |
| <input type="checkbox"/>            | <input checked="" type="checkbox"/> Eukaryotic cell lines       |
| <input checked="" type="checkbox"/> | <input type="checkbox"/> Palaeontology and archaeology          |
| <input type="checkbox"/>            | <input checked="" type="checkbox"/> Animals and other organisms |
| <input checked="" type="checkbox"/> | <input type="checkbox"/> Clinical data                          |
| <input checked="" type="checkbox"/> | <input type="checkbox"/> Dual use research of concern           |

### Methods

| n/a                                 | Involvement in the study                        |
|-------------------------------------|-------------------------------------------------|
| <input checked="" type="checkbox"/> | <input type="checkbox"/> ChIP-seq               |
| <input checked="" type="checkbox"/> | <input type="checkbox"/> Flow cytometry         |
| <input checked="" type="checkbox"/> | <input type="checkbox"/> MRI-based neuroimaging |

## Antibodies

|                 |                                                                                                                                                                                                                                                                                                                                                                                                                                                                                                                          |
|-----------------|--------------------------------------------------------------------------------------------------------------------------------------------------------------------------------------------------------------------------------------------------------------------------------------------------------------------------------------------------------------------------------------------------------------------------------------------------------------------------------------------------------------------------|
| Antibodies used | The following primary antibodies were obtained from these sources respectively:<br>1) Dr Pietro De Camilli's lab at Yale University: rabbit anti-SJ1 (Ock serum), rabbit anti-Auxilin (BABE serum), mouse anti-Amphiphysin 1 (#3), mouse anti-Clathrin Heavy Chain (TD1), rabbit anti-pan-Dynamin (DG1, DG2), rabbit anti-pan-Endophilin (Nuts), mouse anti-GAD65 (GAD6), rabbit anti-SNAP25 (MC21), rabbit anti-Synapsin (G246), mouse anti-VAMP2 (c69.1), rabbit anti-Synaptophysin (G95) and mouse anti-Syt1 (c41.1). |
|-----------------|--------------------------------------------------------------------------------------------------------------------------------------------------------------------------------------------------------------------------------------------------------------------------------------------------------------------------------------------------------------------------------------------------------------------------------------------------------------------------------------------------------------------------|

- 2) Abcam: rabbit anti-LRRK2 (ab133474, MJFF2 [c41-2])
- 3) BD Biosciences: mouse anti- $\alpha$ -synuclein (610786, c42), mouse anti-AP2 (611350, AP50) and mouse anti-Hip1R (612118, c44)
- 4) Cell Signaling Technology: rabbit anti-DARPP-32 (2306, 19A3)
- 5) Life Technologies: mouse anti- $\alpha$ -adaplin (MA1-064, AP6)
- 6) Merck Millipore: mouse anti-Amph2 (05-449, 99D), goat anti-ChAT (AB144P), mouse anti-CLC (AB9884), rat anti-DAT (MAB369, DAT-Nt), mouse anti-SV2C (MABN367, 4C8.1) and rabbit anti-TH (AB152)
- 7) Santa Cruz Biotechnology: mouse anti- $\beta$ -actin (sc-47778, C4) and mouse anti-Hsc70 (sc-7298, B-6)
- 8) Sigma-Aldrich: rabbit anti-Auxilin (HPA031182), rabbit anti-GABA (A2052), rabbit anti-GFAP (ZRB2383, 2E8) and rabbit anti-SJ1 (HPA011916)
- 9) Synaptic systems: rabbit anti-Amphiphysin 1 (120002), rabbit anti-AADC (369003), rabbit anti-SV2B (119102), rabbit anti-SV2C (119202), rabbit anti-Synaptogyrin 3 (103 302), and rabbit anti-Syt11 (270003)
- 10) FUJIFILM Wako Chemicals: rabbit anti-Iba1 (019-19741)

Secondary antibodies used were all purchased from commercial sources as stated:

- 1) Life Technologies: donkey anti-mouse IgG (H+L) Alexa Fluor 594 (A21203), goat anti-mouse IgG (H+L) Alexa Fluor 488 (A11001), goat anti-mouse IgG (H+L) Alexa Fluor 594 (A11032), goat anti-mouse IgG (H+L) Alexa Fluor 647 (A21236), donkey anti-rabbit IgG (H+L) Alexa Fluor 488 (A21206), goat anti-rabbit IgG (H+L) Alexa Fluor 488 (A11034), goat anti-rabbit IgG (H+L) Alexa Fluor 594 (A11037), goat anti-rabbit IgG (H+L) Alexa Fluor 647 (A21244), goat anti-rat IgG (H+L) Alexa Fluor 488 (A11006), goat anti-rat IgG (H+L) Alexa Fluor 594 (A11007) and donkey anti-goat IgG (H+L) Alexa Fluor 488 (A11055)
- 2) LI-COR Biosciences: IRDye 800CW donkey anti-rabbit IgG (926-32213), IRDye 800CW donkey anti-mouse IgG (926-32212), IRDye 680RD donkey anti-mouse IgG (926-68072) and IRDye 800CW goat anti-rat (926-32219)

## Validation

rabbit anti-SJ1, validated using SJ1-KO mice.  
 rabbit anti-Auxilin, validated using Aux-KO mice.  
 mouse anti-Amphiphysin 1, validated using amph1-KO mice  
 rabbit anti-pan-Dynamin, validated using dynamin triple KO cells  
 rabbit anti-pan-Endophilin, validated using endophilin triple KO mice (PubMed: 22099461)  
 rabbit anti-LRRK2, RRID: AB\_2713963, Manufacturer's website states that this antibody is KO validated.  
 mouse anti- $\alpha$ -synuclein, RRID: AB\_2748880  
 mouse anti-AP2, RRID: AB\_398872  
 mouse anti-Hip1R, RRID: AB\_399489  
 rabbit anti-DARPP-32, RRID: AB\_823479  
 rabbit anti-NPY, RRID: AB\_2716286  
 mouse anti- $\alpha$ -adaplin, RRID: AB\_2258307  
 mouse anti-Amph2, RRID: AB\_309738  
 goat anti-ChAT, RRID: AB\_2079751  
 mouse anti-CLC, RRID: AB\_992745  
 rat anti-DAT, RRID: AB\_2190413  
 mouse anti-SV2C, RRID: AB\_2905667  
 rabbit anti-TH, RRID: AB\_390204  
 mouse anti- $\beta$ -actin, RRID: AB\_2714189  
 mouse anti-Hsc70, RRID: AB\_627761  
 rabbit anti-Auxilin, RRID: AB\_10611957  
 rabbit anti-GABA, RRID: AB\_477652  
 rabbit anti-GFAP, RRID: AB\_2905668  
 rabbit anti-SJ1, RRID: AB\_1857692  
 rabbit anti-Amphiphysin 1, RRID: AB\_887690  
 rabbit anti-AADC, RRID: AB\_2620131  
 rabbit anti-SV2B, RRID: AB\_887803, Manufacturer's website states that this antibody is validated using SV2B KO mice (PubMed: 19381277)  
 rabbit anti-SV2C, RRID: AB\_887803  
 rabbit anti-Synaptogyrin 3, RRID: AB\_2619752, Manufacturer's website states that this antibody is validated using quadruple KO mice of Synaptophysin 1 and 2 and synaptogyrin 1 and 3 (PubMed: 31090538).  
 rabbit anti-Syt11, RRID: AB\_2619994, Manufacturer's website states that this antibody is KD validated using primary microglia (PubMed: 28686317)  
 rabbit anti-Iba1, RRID: AB\_839504  
 donkey anti-mouse IgG (H+L) Alexa Fluor 594 (A21203), RRID: AB\_141633  
 goat anti-mouse IgG (H+L) Alexa Fluor 488 (A11001), RRID: AB\_2534069  
 goat anti-mouse IgG (H+L) Alexa Fluor 594 (A11032), RRID: AB\_2534091  
 goat anti-mouse IgG (H+L) Alexa Fluor 647 (A21236), RRID: AB\_2535805  
 donkey anti-rabbit IgG (H+L) Alexa Fluor 488 (A21206), RRID: AB\_2535792  
 goat anti-rabbit IgG (H+L) Alexa Fluor 488 (A11034), RRID: AB\_2576217  
 goat anti-rabbit IgG (H+L) Alexa Fluor 594 (A11037), RRID: AB\_2534095  
 goat anti-rabbit IgG (H+L) Alexa Fluor 647 (A21244), RRID: AB\_2535812  
 goat anti-rat IgG (H+L) Alexa Fluor 488 (A11006), RRID: AB\_2534074  
 goat anti-rat IgG (H+L) Alexa Fluor 594 (A11007), RRID: AB\_10561522  
 donkey anti-goat IgG (H+L) Alexa Fluor 488 (A11055), RRID: AB\_2534102  
 IRDye 800CW donkey anti-rabbit IgG (926-32213), RRID: AB\_621848  
 IRDye 800CW donkey anti-mouse IgG (926-32212), RRID: AB\_621847  
 IRDye 680RD donkey anti-mouse IgG (926-68072), RRID: AB\_10953628  
 IRDye 800CW goat anti-rat (926-32219), RRID: AB\_1850025

## Eukaryotic cell lines

Policy information about [cell lines and Sex and Gender in Research](#)

|                                                                      |                                                                                                                                                                                                                                  |
|----------------------------------------------------------------------|----------------------------------------------------------------------------------------------------------------------------------------------------------------------------------------------------------------------------------|
| Cell line source(s)                                                  | <i>State the source of each cell line used and the sex of all primary cell lines and cells derived from human participants or vertebrate models.</i>                                                                             |
| Authentication                                                       | <i>Describe the authentication procedures for each cell line used OR declare that none of the cell lines used were authenticated.</i>                                                                                            |
| Mycoplasma contamination                                             | <i>Confirm that all cell lines tested negative for mycoplasma contamination OR describe the results of the testing for mycoplasma contamination OR declare that the cell lines were not tested for mycoplasma contamination.</i> |
| Commonly misidentified lines<br>(See <a href="#">ICLAC</a> register) | <i>Name any commonly misidentified cell lines used in the study and provide a rationale for their use.</i>                                                                                                                       |

## Animals and other research organisms

Policy information about [studies involving animals](#); [ARRIVE guidelines](#) recommended for reporting animal research, and [Sex and Gender in Research](#)

|                         |                                                                                                                                                                                                                                            |
|-------------------------|--------------------------------------------------------------------------------------------------------------------------------------------------------------------------------------------------------------------------------------------|
| Laboratory animals      | Aux-KO (RRID: MMRRC036980-JAX): Mus musculus, C57BL/6.129/SV, P0 - 12 month old<br>SJ1-KI: Mus musculus, C57BL/6.129S6, P0 - 12 month old.<br>Aux-KO/SJ1-KI: Mus musculus, Cross Aux-KO strain with SJ1-KI, Mus musculus, P0 - 8 month old |
| Wild animals            | The study did not involve wild animals.                                                                                                                                                                                                    |
| Reporting on sex        | We did not disaggregate for sex . All data collected were from both sex.                                                                                                                                                                   |
| Field-collected samples | The study did not involve samples collected from the field.                                                                                                                                                                                |
| Ethics oversight        | SingHealth Institutional Animal Care and Use Committee (IACUC)                                                                                                                                                                             |

Note that full information on the approval of the study protocol must also be provided in the manuscript.
